# Supplementary material for: Not All Skepticism Is Equal: Exploring the Ideological Antecedents of Science Acceptance and Rejection
Source: PubMed Central journal article supplement — Pers Soc Psychol Bull. 2017 Dec 1;44(3):384–405. doi: 10.1177/0146167217741314 (PMC5810918; doi:10.1177/0146167217741314), 2017-12-01
Supplement: Rutjens_study1_materials.pdf [file Rutjens_study1_materials.pdf]

# Rutjens Study 1

---

Start of Block: Default Question Block

Q2

Welcome to this very short study by the University of Amsterdam, The Netherlands. We would like to ask you to read a short description about a person and then answer a few questions.

Before proceeding, please click both boxes below to confirm that you are at least 18 years old and that you agree to participate.

- I am 18 or older (1)
- I agree to participate in this study (2)

End of Block: Default Question Block

---

Start of Block: MFQ

**Q37 Please begin with responding to the following statements**

---

Q72 -

|                                                                                                                 | strongly disagree (1) | moderately disagree (2) | slightly disagree (3) | moderately agree (4)  | strongly agree (5)    |
|-----------------------------------------------------------------------------------------------------------------|-----------------------|-------------------------|-----------------------|-----------------------|-----------------------|
| Compassion for those who are suffering is the most crucial virtue (1)                                           | <input type="radio"/> | <input type="radio"/>   | <input type="radio"/> | <input type="radio"/> | <input type="radio"/> |
| When the government makes laws, the number one principle should be ensuring that everyone is treated fairly (2) | <input type="radio"/> | <input type="radio"/>   | <input type="radio"/> | <input type="radio"/> | <input type="radio"/> |
| I am proud of my country's history (3)                                                                          | <input type="radio"/> | <input type="radio"/>   | <input type="radio"/> | <input type="radio"/> | <input type="radio"/> |
| Respect for authority is something all children need to learn (4)                                               | <input type="radio"/> | <input type="radio"/>   | <input type="radio"/> | <input type="radio"/> | <input type="radio"/> |
| People should not do things that are disgusting, even if no one is harmed (5)                                   | <input type="radio"/> | <input type="radio"/>   | <input type="radio"/> | <input type="radio"/> | <input type="radio"/> |
| It is better to do good than to do bad (6)                                                                      | <input type="radio"/> | <input type="radio"/>   | <input type="radio"/> | <input type="radio"/> | <input type="radio"/> |
| One of the worst things a person could do is hurt a defenseless animal (7)                                      | <input type="radio"/> | <input type="radio"/>   | <input type="radio"/> | <input type="radio"/> | <input type="radio"/> |

Justice is the most important requirement for a society (8)

People should be loyal to their family members, even when they have done something wrong (9)

Q74 -

|                                                                                                                        | Strongly disagree (1) | moderately disagree (2) | slightly disagree (3) | moderately agree (4)  | strongly agree (5)    |
|------------------------------------------------------------------------------------------------------------------------|-----------------------|-------------------------|-----------------------|-----------------------|-----------------------|
| Men and women each have different roles to play in society (1)                                                         | <input type="radio"/> | <input type="radio"/>   | <input type="radio"/> | <input type="radio"/> | <input type="radio"/> |
| I would call some acts wrong on the grounds that they are unnatural (2)                                                | <input type="radio"/> | <input type="radio"/>   | <input type="radio"/> | <input type="radio"/> | <input type="radio"/> |
| It can never be right to kill a human being (3)                                                                        | <input type="radio"/> | <input type="radio"/>   | <input type="radio"/> | <input type="radio"/> | <input type="radio"/> |
| I think it's morally wrong that rich children inherit a lot of money while poor children inherit nothing (4)           | <input type="radio"/> | <input type="radio"/>   | <input type="radio"/> | <input type="radio"/> | <input type="radio"/> |
| It is more important to be a team player than to express oneself (5)                                                   | <input type="radio"/> | <input type="radio"/>   | <input type="radio"/> | <input type="radio"/> | <input type="radio"/> |
| If I were a soldier and disagreed with my commanding officer's orders, I would obey anyway because that is my duty (6) | <input type="radio"/> | <input type="radio"/>   | <input type="radio"/> | <input type="radio"/> | <input type="radio"/> |

Chastity is an important and valuable virtue (7)

End of Block: MFQ

---

Start of Block: scientific literacy and rejectance

**Q10 Please continue with responding to the following statements**

---

**Q6 The HIV virus causes AIDS**

- strongly disagree* 1 (1)
  - 2 (2)
  - 3 (3)
  - 4 (4)
  - 5 (5)
  - 6 (6)
  - strongly agree* 7 (7)
-

**Q7 Smoking causes lung cancer**

- strongly disagree* 1 (1)
  - 2 (2)
  - 3 (3)
  - 4 (4)
  - 5 (5)
  - 6 (6)
  - strongly agree* 7 (7)
- 

**Q8 Human CO2 emissions cause climate change**

- strongly disagree* 1 (1)
  - 2 (2)
  - 3 (3)
  - 4 (4)
  - 5 (5)
  - 6 (6)
  - strongly agree* 7 (7)
-

**Q9 Vaccinations cause autism**

*strongly disagree* 1 (1)

2 (2)

3 (3)

4 (4)

5 (5)

6 (6)

*strongly agree* 7 (7)

---

Page Break

Q76 We believe too often in science, and not enough in feelings and faith

- strongly disagree* 1 (1)
  - 2 (2)
  - 3 (3)
  - 4 (4)
  - 5 (5)
  - 6 (6)
  - strongly agree* 7 (7)
- 

Q77 Science tells us everything there is to know about what reality consists of

- strongly disagree* 1 (1)
  - 2 (2)
  - 3 (3)
  - 4 (4)
  - 5 (5)
  - 6 (6)
  - strongly agree* 7 (7)
-



Q78 The scientific method is the only reliable path to knowledge

- strongly disagree* 1 (1)
  - 2 (2)
  - 3 (3)
  - 4 (4)
  - 5 (5)
  - 6 (6)
  - strongly agree* 7 (7)
- 

Q79 The only real kind of knowledge we can have is scientific knowledge

- strongly disagree* 1 (1)
  - 2 (2)
  - 3 (3)
  - 4 (4)
  - 5 (5)
  - 6 (6)
  - strongly agree* 7 (7)
-

Q80 Science is the most efficient means of attaining truth

- strongly disagree* 1 (1)
- 2 (2)
- 3 (3)
- 4 (4)
- 5 (5)
- 6 (6)
- strongly agree* 7 (7)

End of Block: scientific literacy and rejectance

---

Start of Block: demography

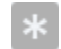

Q25 What is your nationality?

---

---

Q27 What is your age?

---

---

Q29 What is your gender?

- Male (1)
- Female (2)
- Other / rather not say (3)

---

Q31 Do you consider yourself to be a religious person?

Yes (1)

No (2)

---

Q31 Do you believe in God or a higher power?

Answer (1)

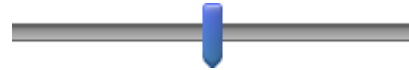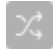

Q33 What is your religious affiliation?

None (1)

Protestant (2)

Muslim (3)

Hindu (4)

Buddhist (5)

Jewish (6)

Atheist (7)

Agnostic (8)

Catholic (9)

Other: (10) \_\_\_\_\_

Q37 What is your political orientation?

Answer (1)

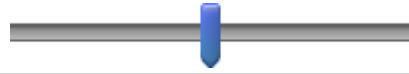

---

Page Break

Q33 How would you describe your political outlook with regard to social issues?

Answer (1)

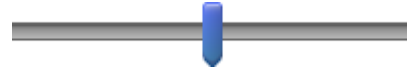

---

Q34 How would you describe your political outlook with regard to economic issues?

Answer (1)

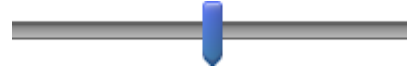

End of Block: demography

---

Start of Block: Orthodoxy subscale (Postcritical belief scale)

**Q81 Please respond to the statements below**

|                                                                                                                          | I strongly disagree<br>(1) | I disagree<br>(2)     | I somewhat disagree<br>(3) | I neither agree, nor disagree<br>(4) | I somewhat agree<br>(5) | I agree<br>(6)        | I strongly agree<br>(7) |
|--------------------------------------------------------------------------------------------------------------------------|----------------------------|-----------------------|----------------------------|--------------------------------------|-------------------------|-----------------------|-------------------------|
| God has been defined for once and for all and therefore is immutable.<br>(1)                                             | <input type="radio"/>      | <input type="radio"/> | <input type="radio"/>      | <input type="radio"/>                | <input type="radio"/>   | <input type="radio"/> | <input type="radio"/>   |
| Even though this goes against modern rationality, I believe Mary truly was a virgin when she gave birth to Jesus.<br>(4) | <input type="radio"/>      | <input type="radio"/> | <input type="radio"/>      | <input type="radio"/>                | <input type="radio"/>   | <input type="radio"/> | <input type="radio"/>   |
| Only the major religious traditions guarantee admittance to God. (5)                                                     | <input type="radio"/>      | <input type="radio"/> | <input type="radio"/>      | <input type="radio"/>                | <input type="radio"/>   | <input type="radio"/> | <input type="radio"/>   |
| Religion is the one thing that gives meaning to life in all its aspects.<br>(3)                                          | <input type="radio"/>      | <input type="radio"/> | <input type="radio"/>      | <input type="radio"/>                | <input type="radio"/>   | <input type="radio"/> | <input type="radio"/>   |

Ultimately,  
there is  
only one  
correct  
answer to  
each  
religious  
question.  
(2)

Only a  
priest can  
give an  
answer to  
important  
religious  
questions.  
(6)

I think that  
Bible  
stories  
should be  
taken  
literally, as  
they are  
written. (7)

You can  
only live a  
meaningful  
life if you  
believe.  
(8)

We would  
like to  
make sure  
that you  
are paying  
attention  
to the  
wording of  
the  
questions.  
Please  
click "I  
somewhat  
disagree"  
as a  
response  
to this

item. (9) |

-----

Page Break 

---



**Q33 Below, you can view the 'Discretionary Spending Pie' for the US in 2015. In the next and final part of the study, it is your job to rearrange the percentages to your own liking for the year 2016.**

---

Q34

---

Q36 Timing  
First Click (1)  
Last Click (2)  
Page Submit (3)  
Click Count (4)

---

**Q35 Below, we present these 12 spending areas in order of spending budget. It is up to you to indicate changes to the spending pie, by rearranging the order of areas. Which spending areas should be prioritized in 2016? You can drag and drop the different items to rearrange the order.**

**(If you are fine with the current order, you can leave it exactly like this.)**

- Military (1)
- Government (2)
- Education (3)
- Medicare & Health (4)
- Veterans' benefits (5)
- Housing & Community (6)
- International Affairs (7)
- Energy & Environment (8)
- Science (9)
- Social Security, Unemployment & Labor (10)
- Transportation (11)
- Food & Agriculture (12)

End of Block: Orthodoxy subscale (Postcritical belief scale)

---

Start of Block: End
